# Supplementary material for: Towards co-operative reactivity in conjoint classical-organometallic heterometallic complexes: the co-ordination chemistry of novel ligands with triphenylphosphine and bis(pyridylethyl)amine or triazacyclononane domains
Source: Royal Society of Chemistry journal article supplement (doi:10.1039/b201720m), 2002-01-01
Supplement: b201720m.pdf [file b201720m.pdf]

**Towards co-operative reactivity in conjoint classical–organometallic heterometallic complexes: The co-ordination chemistry of novel ligands with triphenylphosphine and bis(pyridylethyl)amine or triazacyclononane domains**

**Scott E. Watkins, Donald C. Craig and  
Stephen B. Colbran\***

---

**Electronic Supplementary Information**

**ESI Table 1.** ES-MS, 300 MHz  $^1\text{H}$  NMR and 121 MHz  $^{31}\text{P}\{^1\text{H}\}$  NMR data for the mononuclear complexes.

| Complex                                                                  | Positive-ion ES-MS<br>$m/z$ found <sup>a</sup> ( $m/z$ calcd <sup>a</sup> ) [ion] <sup>z+</sup>                                      | $^1\text{H}$ NMR<br>solvent: $\delta_{\text{H}}$                                                                                                                                                         | $^{31}\text{P}\{^1\text{H}\}$ NMR<br>solvent; $\delta_{\text{P}}$ ( $J_{\text{PX}}/\text{Hz}$ ) |
|--------------------------------------------------------------------------|--------------------------------------------------------------------------------------------------------------------------------------|----------------------------------------------------------------------------------------------------------------------------------------------------------------------------------------------------------|-------------------------------------------------------------------------------------------------|
| $[\text{Cu}(\text{L}^1)][\text{PF}_6]$                                   | 564.0 (564.0) $[\text{Cu}(\text{L}^1)]^+$                                                                                            | $(\text{CD}_3)_2\text{CO}$ : 8.85 (2 H, br s), 7.94 (2 H, t), 7.61 (1 H, t), 7.60–7.35 (12 H, m), 7.30–7.20 (4 H, m), 6.92 (1 H, t), 3.91 (2 H, s), 3.10–2.50 (8 H, m)                                   | $(\text{CD}_3)_2\text{CO}$ : –10 (br s; fwhh = 1600 Hz), –142.03 ( $J_{\text{PF}}$ 707)         |
| $[\text{Cu}(\text{L}^2)][\text{PF}_6]$                                   | 550.0 (550.0) $[\text{Cu}(\text{L}^2)]^+$                                                                                            | $(\text{CD}_3)_2\text{CO}$ : 7.65–7.50 (8 H, m), 7.50–7.45 (5 H, m), 6.94 (1 H, t), 3.88 (2 H, s), 3.39 (2 H, sept), 3.15–2.55 (12 H, m), 1.47 (6 H, d), 1.13 (6 H, d)                                   | $(\text{CD}_3)_2\text{CO}$ : –0.3 (br s; fwhh = 700 Hz), –142.00 ( $J_{\text{PF}}$ 707)         |
| $[\text{ZnCl}(\text{L}^2)][\text{PF}_6]$                                 | 588.0 (588.0) $[\text{ZnCl}(\text{L}^2)]^+$                                                                                          | $\text{CDCl}_3$ : 7.63 (1 H, m), 7.55–7.32 (12 H, m), 6.99 (1 H, t), 4.14 (2 H, s), 3.51 (2 H, sept), 3.25–3.10 (2 H, m), 3.03 (6 H, m), 2.95–2.70 (4 H, m), 1.25 (6 H, d), 1.21 (6 H, d)                | $\text{CDCl}_3$ : –17.71 (s), –143.76 ( $J_{\text{PF}}$ 707)                                    |
| $[\text{PtCl}(\text{L}^1)][\text{PF}_6]$                                 | 732.0 (732.0) $[\text{PtCl}(\text{L}^1)]^+$                                                                                          | $(\text{CD}_3)_2\text{CO}$ : 8.67 (2 H, br s), 8.20–7.20 (18 H, br m), 7.07 (2 H, t), 4.76 (2 H, br m), 3.95 (2 H, br s), 3.29 (6 H, br m)                                                               | $(\text{CD}_3)_2\text{CO}$ : –0.78 ( $J_{\text{PPt}}$ 3624), –142.03 ( $J_{\text{PF}}$ 707)     |
| $[\text{PtCl}(\text{L}^2)][\text{PF}_6]$                                 | 718.0 (718.0) $[\text{PtCl}(\text{L}^1)]^+$                                                                                          | $\text{CDCl}_3$ : 7.81 (2 H, t), 7.70–7.30 (48 H, m), 6.88 (2 H, t), 4.50–3.30 (16 H, m), 3.30–2.80 (26 H, m), 1.20 (14 H, d), 0.9 (10 H, m)                                                             | $\text{CDCl}_3$ : –0.71 ( $J_{\text{PPt}}$ 3752), –143.50 ( $J_{\text{PF}}$ 707)                |
| <i>trans</i> - $[\text{PtCl}_2(\text{H}_3\text{L}^1)_2](\text{ClO}_4)_6$ | 1369.0 (1369.0) $[\text{PtCl}_2(\text{HL}^1)_2 + \text{ClO}_4]^+$ , 635.0 <sup>b</sup> (635.0) $[\text{PtCl}_2(\text{HL}^1)_2]^{2+}$ | $\text{CDCl}_3$ : 8.98 (4 H, d), 8.74 (4 H, t), 8.21 (4 H, t), 8.10–7.00 (32 H, m), 5.05 (4 H, s), 3.58 (16 H, m)                                                                                        | $\text{CDCl}_3$ : 18.42 ( $J_{\text{PPt}}$ 2567)                                                |
| <i>trans</i> - $[\text{PtCl}_2(\text{HL}^2)_2][\text{PF}_6]_2$           | 1387.0 (1387.0) $[\text{PtCl}_2(\text{HL}^2)_2 + \text{PF}_6]^+$ , 621.0 <sup>b</sup> (621.0) $[\text{PtCl}_2(\text{HL}^2)_2]^{2+}$  | $(\text{CD}_3)_2\text{CO}$ : 7.95–7.75 (10 H, m), 7.65–7.45 (14 H, m), 7.29 (2 H, t), 7.09 (2 H, q), 4.50 (4 H, s), 3.35 (4 H, sept), 3.27 (4 H, m), 3.10–2.60 (20 H, m), 1.30 (12 H, d), 1.18 (12 H, d) | $(\text{CD}_3)_2\text{CO}$ : 15.44 ( $J_{\text{PPt}}$ 2597), –142.05 ( $J_{\text{PF}}$ 707)     |
| <i>cis</i> - $[\text{PtCl}_2(\text{L}^3)_2]$                             | 1235.0 (1235.0) $[\text{PtCl}(\text{L}^3)_2]^+$ , 617.5 <sup>b</sup> (617.5) $[\text{PtCl}(\text{HL}^3)_2]^{2+}$                     | $\text{CDCl}_3$ : 8.44 (4 H, d), 7.70–6.90 (40 H, br m), 3.55 (4 H, s), 2.86 (16 H, s)                                                                                                                   | $\text{CDCl}_3$ : 15.03 ( $J_{\text{PPt}}$ 3674)                                                |

*ESI Table 1 continues on the next page.....*

*ESI Table 1 continues.....*

| Complex                                                                                           | Positive-ion ES-MS <sup>a</sup><br><i>m/z</i> found <sup>a</sup> ( <i>m/z</i> calcd <sup>a</sup> ) [ion] <sup>z+</sup> | <sup>1</sup> H NMR<br>solvent: $\delta_{\text{H}}$                                                                                                                                                                                                                                | <sup>31</sup> P{ <sup>1</sup> H} NMR<br>solvent; $\delta_{\text{P}}$ ( <i>J</i> <sub>PX</sub> /Hz)              |
|---------------------------------------------------------------------------------------------------|------------------------------------------------------------------------------------------------------------------------|-----------------------------------------------------------------------------------------------------------------------------------------------------------------------------------------------------------------------------------------------------------------------------------|-----------------------------------------------------------------------------------------------------------------|
| <i>trans</i> -[PtCl <sub>2</sub> (HL <sup>4</sup> ) <sub>2</sub> ][PF <sub>6</sub> ] <sub>2</sub> | 621.0 <sup>b</sup> (621.0) [PtCl <sub>2</sub> (HL <sup>4</sup> ) <sub>2</sub> ] <sup>2+</sup>                          | (CD <sub>3</sub> ) <sub>2</sub> CO: 8.10 (2 H, m), 7.90–7.60 (20 H, m), 7.60–7.20 (32 H, m), 3.92 (4 H, s), 3.56 (2 H, q), 3.39 (2 H, q), 3.13 (12 H, m), 2.89 (16 H, m), 2.73 (10 H, m), 1.09 (24 H) — includes peaks for significant benzonitrile contaminant ( $\approx$ 20 %) | (CD <sub>3</sub> ) <sub>2</sub> CO: 22.93 ( <i>J</i> <sub>Pt</sub> 2643), –142.04 ( <i>J</i> <sub>PF</sub> 707) |
| <i>trans</i> -[IrCl(CO)(L <sup>3</sup> ) <sub>2</sub> ] <sup>c</sup>                              | 630.0 <sup>b</sup> (630.0)<br>[IrCl(CO)(L <sup>3</sup> ) <sub>2</sub> ] <sup>2+</sup>                                  | CDCl <sub>3</sub> : 8.45 (4 H, d), 7.66 (10 H, br s), 7.53 (2 H, br s), 7.40 (4 H, t), 7.35–7.30 (12 H, m), 7.25–7.20 (4 H, m), 7.00 (4 H, t), 6.94 (4 H, d), 6.60 (0.001 H, d), 3.66 (4 H, s), 2.84 (16 H, s) — includes peaks for trace <i>p</i> -toluidine ( $\approx$ 0.2%)   | CDCl <sub>3</sub> : 24.68;<br>thf: 25.55                                                                        |
| [W(CO) <sub>5</sub> (L <sup>3</sup> )] <sup>d</sup>                                               | 825.0 (825.0) [W(CO) <sub>5</sub> (HL <sup>3</sup> )] <sup>+</sup>                                                     | CDCl <sub>3</sub> : 8.45 (2 H, d), 7.60–7.35 (12 H, m), 7.26 (4 H, m), 7.08 (2 H, m), 6.98 (2 H, d), 3.73 (2 H, s), 2.90 (8 H, s)                                                                                                                                                 | CDCl <sub>3</sub> : 21.49 ( <i>J</i> <sub>PW</sub> 243)                                                         |

<sup>a</sup> Peak for the most abundant isotopomer of each ion. <sup>b</sup> Half-integer spacing between isotopomer peaks for ion observed.

<sup>c</sup> IR:  $\nu_{\text{CO}}$  (thf) 1965s cm<sup>-1</sup>. <sup>d</sup> IR:  $\nu_{\text{CO}}$  (CDCl<sub>3</sub>) 2071m, 1983w, 1939vs cm<sup>-1</sup>.

| Complex                                                                                                                    | Partial EA data (%) |                |                | ICP-AES<br>element ratios <sup>a</sup> |            |            | X-Band EPR (77 K)      |                                   |                       | <i>d-d</i> Bands (400–1400 nm)                                               |
|----------------------------------------------------------------------------------------------------------------------------|---------------------|----------------|----------------|----------------------------------------|------------|------------|------------------------|-----------------------------------|-----------------------|------------------------------------------------------------------------------|
|                                                                                                                            | C                   | H              | N              | Cu                                     | Pt         | P          | <i>g</i> <sub>  </sub> | <i>A</i> <sub>  </sub> / <i>G</i> | <i>g</i> <sub>⊥</sub> | $\lambda_{\text{max}}/\text{nm}$ ( $\epsilon/\text{M}^{-1} \text{cm}^{-1}$ ) |
| [PtCl <sub>2</sub> {(L <sup>1</sup> )Cu(OAc)} <sub>2</sub> ](ClO <sub>4</sub> ) <sub>2</sub> <sup>b</sup>                  | 49.11<br>(49.07)    | 4.44<br>(4.12) | 5.15<br>(4.91) | 2.1<br>(2)                             | 1.0<br>(1) | 2.7<br>(2) | 2.26                   | 166                               | 2.06                  | 664 (300)                                                                    |
| [PtCl <sub>2</sub> {(L <sup>2</sup> )Cu(OAc)} <sub>2</sub> ][PF <sub>6</sub> ] <sub>2</sub> ·H <sub>2</sub> O <sup>b</sup> | 44.08<br>(44.17)    | 4.99<br>(5.17) | 4.43<br>(4.68) | 2.2<br>(2)                             | 1.0<br>(1) | 4.0<br>(4) | 2.25                   | 164                               | 2.07                  | 661 (80), 1081 (20)                                                          |
| [PtCl <sub>2</sub> {(L <sup>4</sup> )Cu(OAc)} <sub>2</sub> ][PF <sub>6</sub> ] <sub>2</sub> <sup>b</sup>                   | 45.71<br>(44.62)    | 5.18<br>(5.11) | 5.06<br>(4.73) | 1.7<br>(2)                             | 1.0<br>(1) | 4.1<br>(4) | 2.26                   | 160                               | 2.07                  | 647 (60), 1072 (40)                                                          |
| [PtCl <sub>2</sub> {(L <sup>3</sup> )CuCl <sub>2</sub> } <sub>2</sub> ] <sub>2</sub> ·3H <sub>2</sub> O <sup>c</sup>       | 49.61<br>(49.79)    | 4.25<br>(4.43) | 5.16<br>(5.28) | 2.6<br>(2)                             | 1.0<br>(1) | 2.2<br>(2) | 2.23                   | 121                               | 2.10                  | 776 (190), 988 (140)                                                         |
| [IrCl(CO){(L <sup>3</sup> )CuCl <sub>2</sub> } <sub>2</sub> ] <sub>2</sub> ·6H <sub>2</sub> O <sup>c</sup>                 | 47.24<br>(47.15)    | 3.96<br>(4.49) | 4.82<br>(4.92) |                                        | <i>d</i>   |            | 2.23                   | 125                               | 2.10                  | 771 (160), 988 (120)                                                         |

<sup>a</sup> Calculated from measurements of individual element concentrations that were reproducible to  $\pm 10\%$ .

<sup>b</sup> Spectra for complex in MeCN solution. <sup>c</sup> Spectra for complex in CHCl<sub>3</sub> solution. <sup>d</sup> Not measured (see text).

**ESI Table 2.** Found (and calculated) analytical and X-band EPR and electronic spectral data for multinuclear complexes.

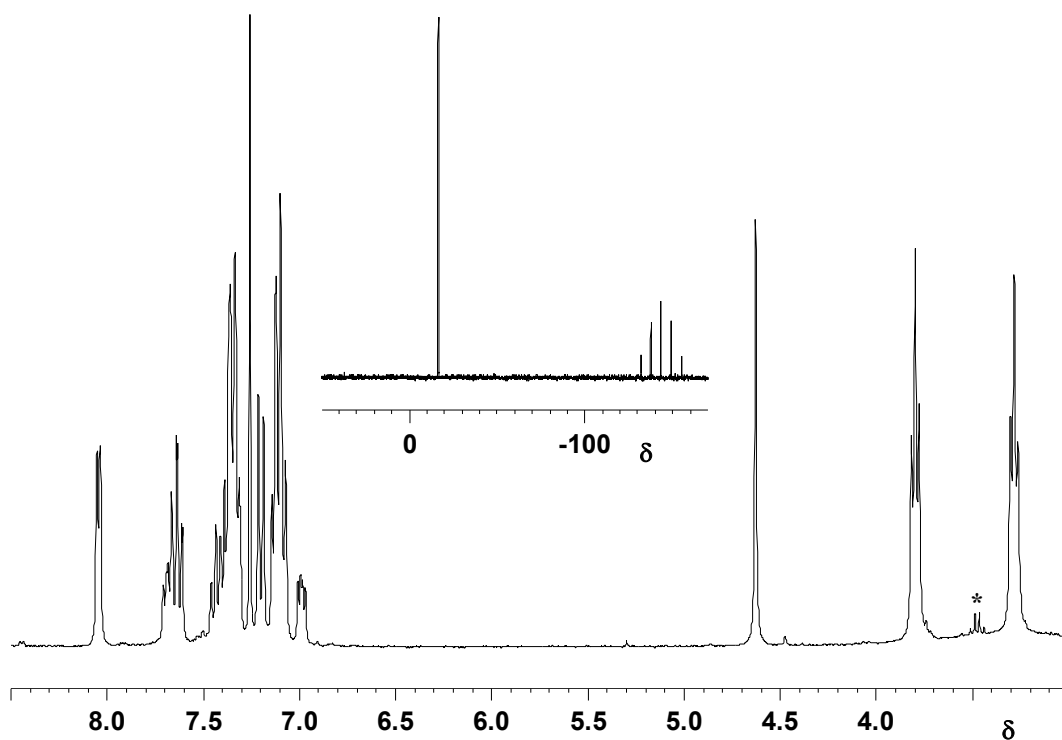

**ESI Fig. 1(a).** 300 MHz  $^1\text{H}$  and 121 MHz  $^{31}\text{P}\{^1\text{H}\}$  (inset) nmr spectra of  $[\text{HL}^1][\text{PF}_6]$  in  $\text{CDCl}_3$  at 300 K (\* diethyl ether).

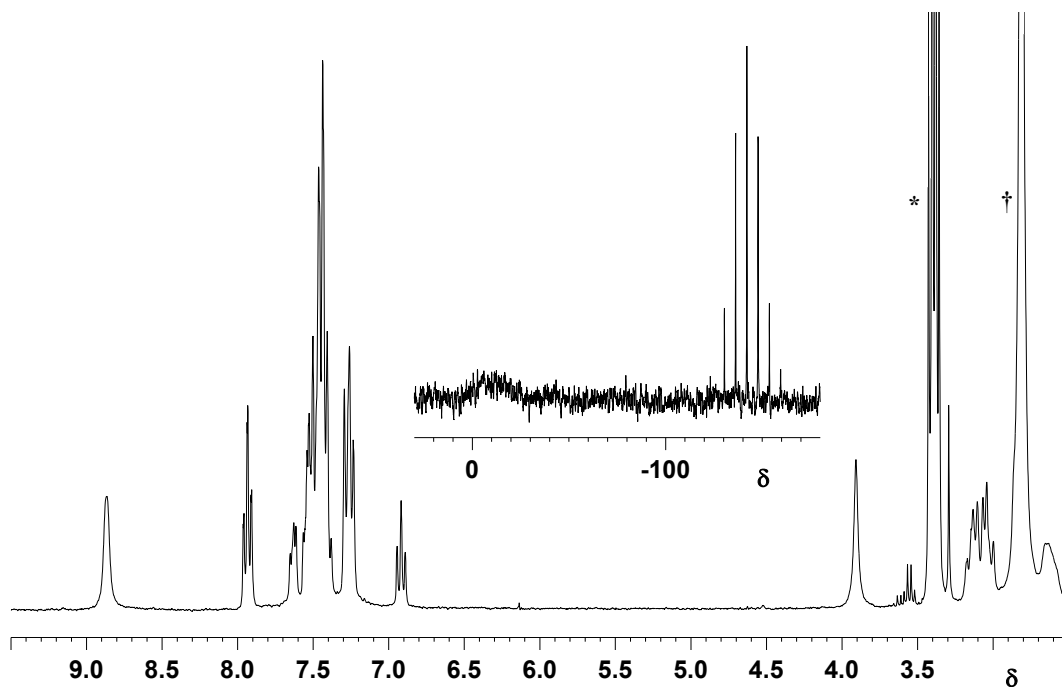

**ESI Fig. 1(b).** 300 MHz  $^1\text{H}$  and 121 MHz  $^{31}\text{P}\{^1\text{H}\}$  (inset) nmr spectra of  $[\text{Cu}(\text{L}^1)][\text{PF}_6]$  in  $(\text{CD}_3)_2\text{CO}$  at 300 K (\* diethyl ether, †  $\text{H}_2\text{O}$ ).

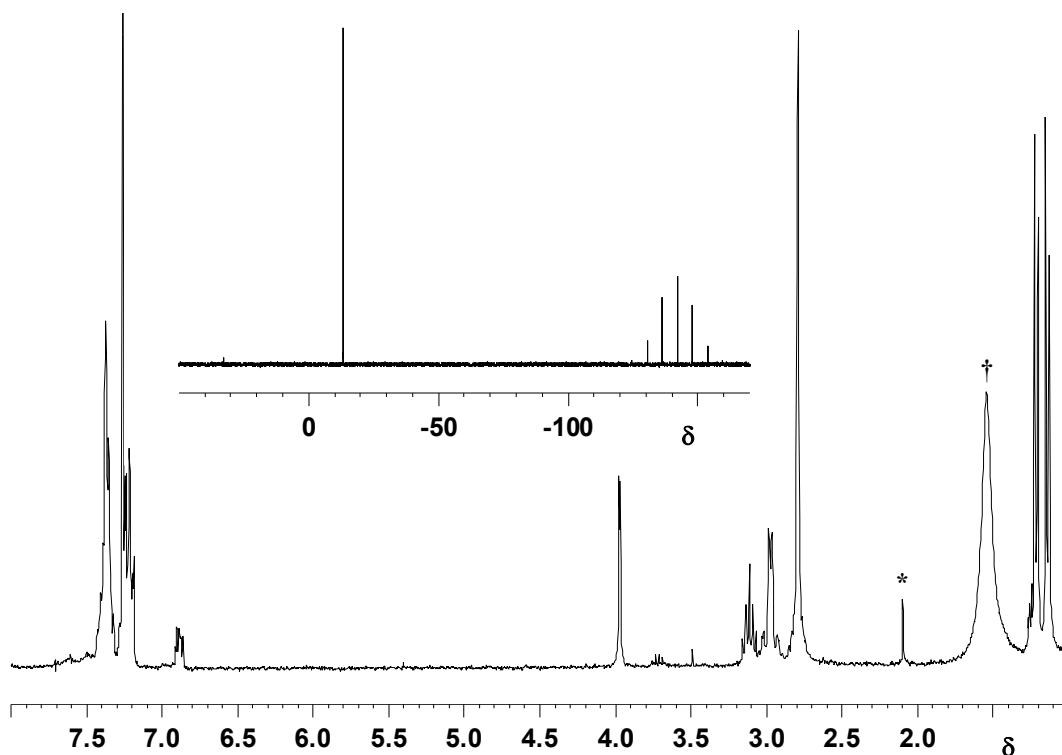

**ESI Fig. 2(a).** 300 MHz  $^1\text{H}$  (in  $\text{CDCl}_3$ ) and 121 MHz  $^{31}\text{P}\{^1\text{H}\}$  [inset in  $(\text{CD}_3)_2\text{CO}$ ] nmr spectra of  $[\text{HL}^2][\text{PF}_6]$  at 300 K (\*  $\text{CH}_3\text{COOH}$ , †  $\text{H}_2\text{O}$ ).

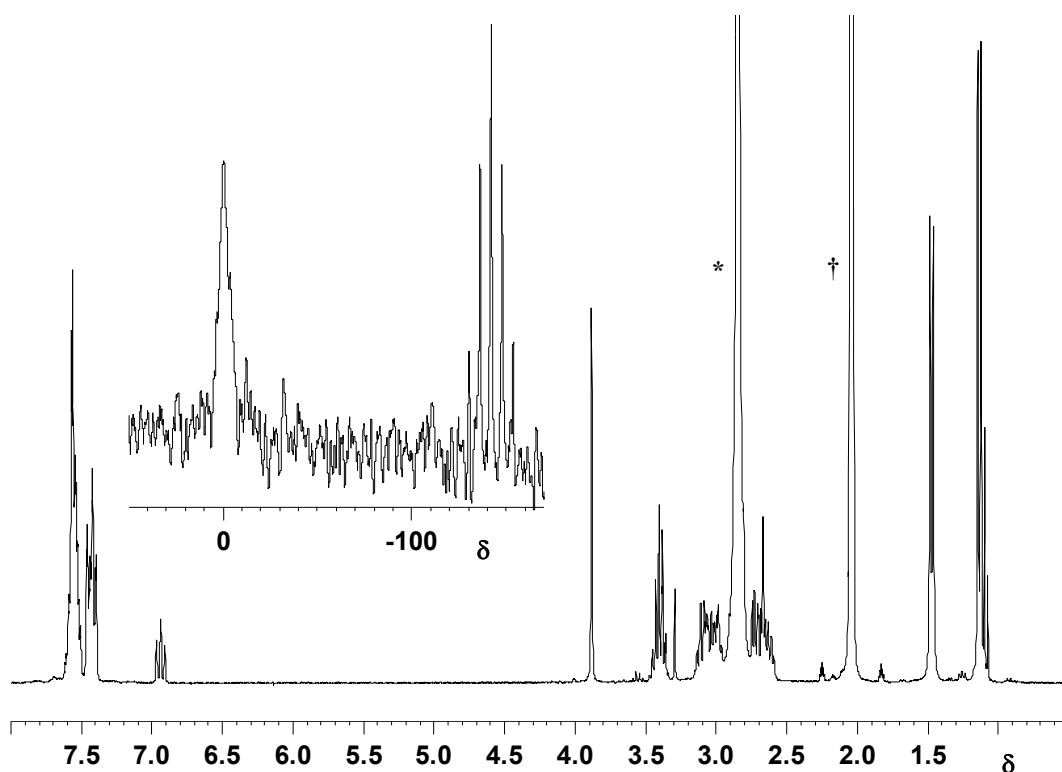

**ESI Fig. 2(b).** 300 MHz  $^1\text{H}$  and 121 MHz  $^{31}\text{P}\{^1\text{H}\}$  (inset) nmr spectra of  $[\text{Cu}(\text{L}^2)][\text{PF}_6]$  in  $(\text{CD}_3)_2\text{CO}$  at 300 K (\*  $\text{H}_2\text{O}$ , † acetone).

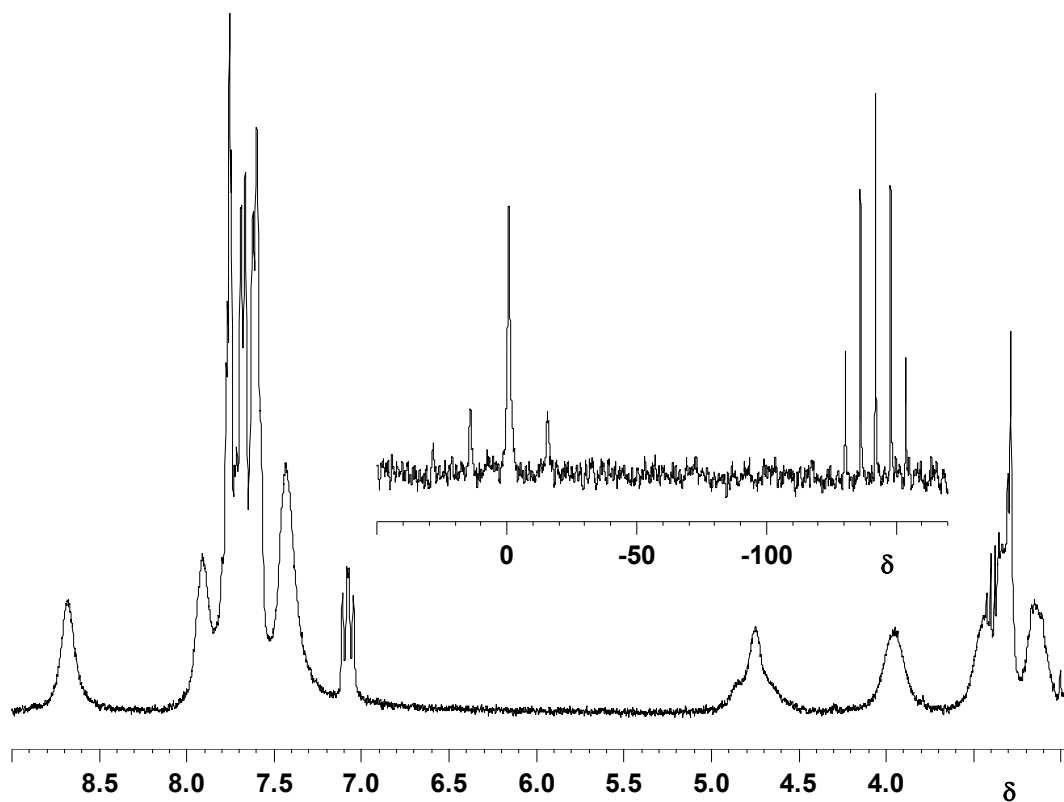

**ESI Fig. 3.** 300 MHz  $^1\text{H}$  and 121 MHz  $^{31}\text{P}\{^1\text{H}\}$  (inset) nmr spectra of  $[\text{PtCl}(\text{L}^1)][\text{PF}_6]$  in  $(\text{CD}_3)_2\text{CO}$  at 300 K.

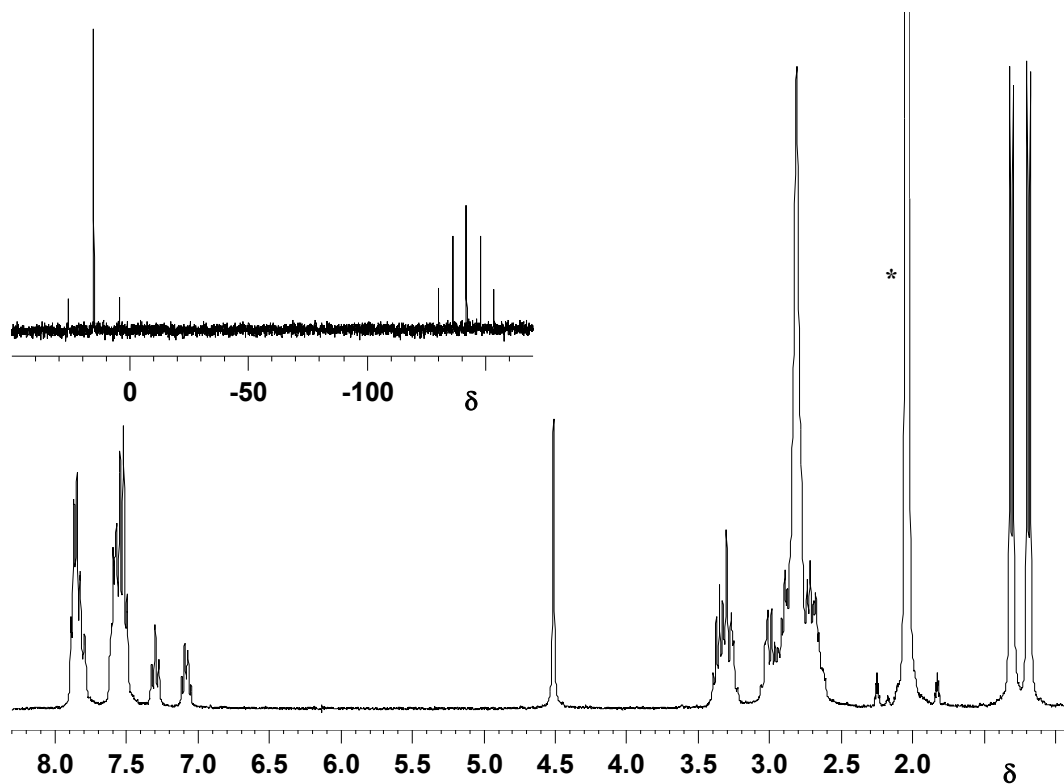

**ESI Fig. 4.** 300 MHz  $^1\text{H}$  and 121 MHz  $^{31}\text{P}\{^1\text{H}\}$  (inset) nmr spectra of  $[\text{PtCl}_2(\text{HL}^2)_2][\text{PF}_6]_2$  in  $(\text{CD}_3)_2\text{CO}$  at 300 K (\* acetone).

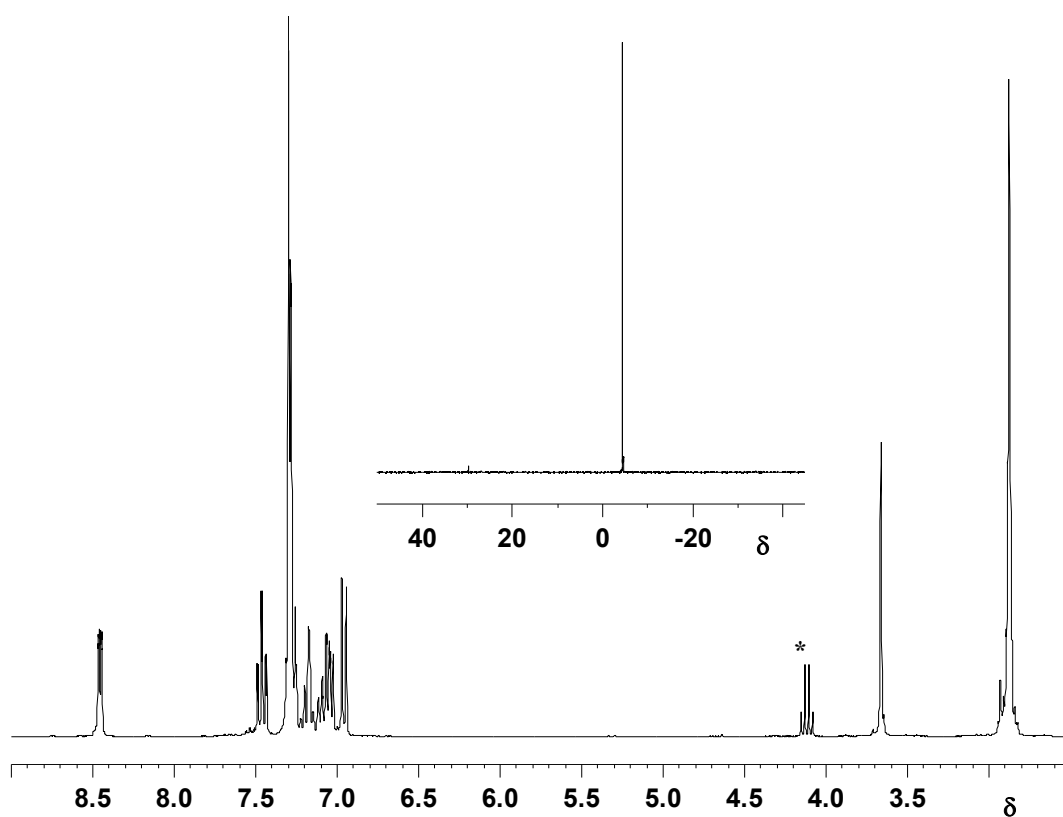

**ESI Fig. 5(a).** 300 MHz  $^1\text{H}$  and 121 MHz  $^{31}\text{P}\{^1\text{H}\}$  (inset) nmr spectra of  $\text{L}^3$  in  $\text{CDCl}_3$  at 300 K (\* ethyl acetate).

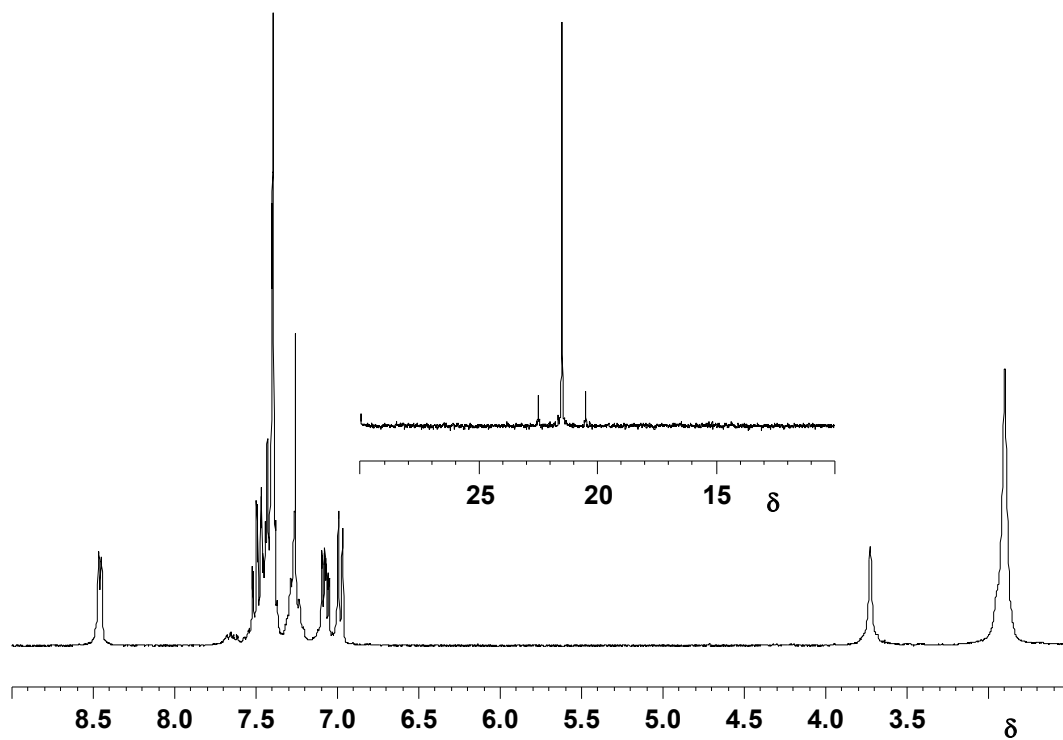

**ESI Fig. 5(b).** 300 MHz  $^1\text{H}$  and 121 MHz  $^{31}\text{P}\{^1\text{H}\}$  (inset) nmr spectra of  $[\text{W}(\text{CO})_5(\text{L}^3)]$  in  $\text{CDCl}_3$  at 300 K.



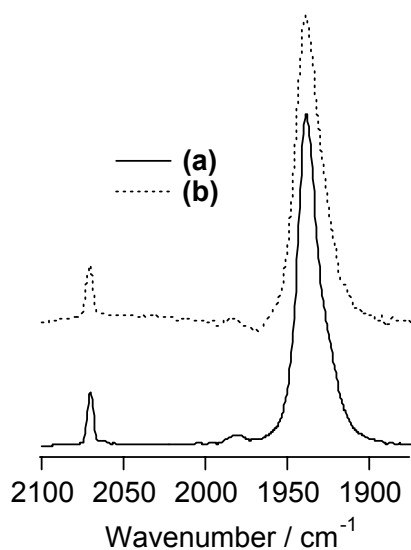

**ESI Fig. 6.** The FTIR spectrum in the CO region of a tetrahydrofuran solution of  $[\text{W}(\text{CO})_5(\text{L}^3)]$  prior to (a) and after (b) the addition of 10 molar equivalents of  $\text{Cu}(\text{ClO}_4)_2 \cdot 6\text{H}_2\text{O}$  (s).

| Added metal salt                                      | $\nu_{\text{CO}} / \text{cm}^{-1}$ (absorbance) |              |
|-------------------------------------------------------|-------------------------------------------------|--------------|
| —                                                     | 2070 (0.015)                                    | 1939 (0.075) |
| $\text{Mn}(\text{ClO}_4)_2 \cdot 6\text{H}_2\text{O}$ | 2071 (0.011)                                    | 1940 (0.057) |
| $\text{Fe}(\text{ClO}_4)_2 \cdot 6\text{H}_2\text{O}$ | 2071 (0.013)                                    | 1940 (0.063) |
| $\text{Co}(\text{ClO}_4)_2 \cdot 6\text{H}_2\text{O}$ | 2071 (0.014)                                    | 1940 (0.070) |
| $\text{Ni}(\text{ClO}_4)_2 \cdot 6\text{H}_2\text{O}$ | 2071 (0.014)                                    | 1939 (0.072) |
| $\text{Cu}(\text{ClO}_4)_2 \cdot 6\text{H}_2\text{O}$ | 2071 (0.014)                                    | 1940 (0.069) |
| $\text{Zn}(\text{ClO}_4)_2 \cdot 6\text{H}_2\text{O}$ | 2071 (0.014)                                    | 1939 (0.068) |

**ESI Table 3.** FTIR spectral data for a solution of  $[\text{W}(\text{CO})_5(\text{L}^3)]$  in tetrahydrofuran prior to and following the addition of transition metal salts (10 molar equivalents).
